# Supplementary material
Source: HighWire-hosted journal article supplement (https://bmjopenquality.bmj.com/content/7/3/e000362)
Supplement: inline-supplementary-material-1 [file inline-supplementary-material-1.docx]

**Supplementary file 1: Study design, data collection time points, method of collection, and measures across implementation phases of PTB**

| **Design** | **Data collection time point** | **Method of data collection** | **Measures** |
| --- | --- | --- | --- |
| ***Prospective*** | Baseline:  3 months pre-implementation | Structured observations | SSC   - Participation - Sign-in - Time-out - Sign-out |
|  |  |  |  |
|  | 6 months post-implementation | Structured observations | SSC   - Participation - Sign-in - Time-out - Sign-out |
|  | 12 months post-implementation | Structured observations | SSC   - Participation - Sign-in - Time-out - Sign-out |
|  |  |  |  |
| ***Retrospective*** | 12 months pre-implementation  12 months post-implementation | Clinical incident database audit | - Wrong site/side/level - Retained foreign objects/miscounts - Mislabelling of tissue specimens - Surgical injuries, e.g., diathermy burns, positioning injuries, nerve damage - Wrong or missing medication, e.g., antibiotics - Pressure injuries, surgical site infections |

*Abbreviations:* SSC=Surgical Safety Checklist
