# Supplementary material
Source: HighWire-hosted journal article supplement (https://bmjopenquality.bmj.com/content/7/3/e000362)
Supplement: inline-supplementary-material-2 [file inline-supplementary-material-2.docx]

**Appendix**

| Severity Assessment Code (SAC) categories31:   1. *SAC* 1 includes all clinical incidents/near misses where serious harm or death is/could be specifically caused by health care rather than the patient’s underlying condition or illness. 2. *SAC 2* includes all clinical incidents/near misses where moderate harm is/could be specifically caused by health care rather than the patient’s underlying condition or illness. 3. *SAC 3* includes all clinical incidents/near misses where minimal or no harm is/could be specifically caused by health care rather than the patient’s underlying condition or illness. |
| --- |
